# Supplementary material for: Characterization of SARS-CoV-2 Variants N501Y.V1 and N501Y.V2 Spike on Viral Infectivity
Source: Front Cell Infect Microbiol. 2021 Oct 13;11:720357. doi: 10.3389/fcimb.2021.720357 (PMC8549493; doi:10.3389/fcimb.2021.720357)
Supplement: Supplementary file 7 [file Table_3.xlsx]

## Sheet: Table S3
Table S3. Primers design for calculating pseudotyped virus particles.
	Sequence (5'-3')
VSV-P-F	TCTCGTCTGGATCAGGCGG
VSV-P-R	TGCTCTTCCACTCCATCCTCTTGG
